# Supplementary material for: Screening apelin analogues and a small molecule agonist as effective cardiovascular therapeutics against reperfusion injury
Source: Royal Society of Chemistry journal article supplement (doi:10.1039/d5md00985e), 2025-12-19
Supplement: d5md00985e1.pdf [file d5md00985e1.pdf]

## Screening apelin analogues and a small molecule agonist as effective cardiovascular therapeutics against reperfusion injury

Anjalee Wijewardane<sup>a</sup>, Kleinberg X. Fernandez<sup>a</sup>, Anran Zhang<sup>bc</sup>, Conrad Fischer<sup>a</sup>, Dineth P. Nagahawatta<sup>bc</sup>, Xavier Iturrioz<sup>e</sup>, Charlotte Avet<sup>f</sup>, Bethan L. Heard<sup>a</sup>, Catherine Llorens-Cortes<sup>d,e</sup>, Gavin Y. Oudit<sup>bc</sup>, Michel Bouvier<sup>f</sup>, John C. Vederas<sup>a</sup>

### Table of Contents

|                                                                         |          |
|-------------------------------------------------------------------------|----------|
| <b>1. Chemical synthesis and structures of RI apelin analogues.....</b> | <b>2</b> |
| a. RI-13 .....                                                          | 2        |
| b. RI-13A2.....                                                         | 2        |
| c. RI-17 .....                                                          | 3        |
| d. RI-17A2.....                                                         | 3        |
| <b>2. Radioligand displacement assays of RI apelin analogues.....</b>   | <b>4</b> |
| <b>3. Effects of APJ agonists on blood pressure .....</b>               | <b>5</b> |
| <b>4. Biased signaling profile values for tested APJ ligands .....</b>  | <b>6</b> |

## 1. Chemical synthesis and structures of RI apelin analogues

### a. RI-13

Peptide RI-3 was synthesized following the general SPPS elongation procedure introducing amino acids in the following order: Fmoc-D-Arg(Pbf)-OH, Fmoc-D-Pro-OH, Fmoc-d-Arg(Pbf)-OH, Fmoc-D-Leu-OH, Fmoc-D-Ser(tBu)-OH, Fmoc-D-His(Trt)-OH, Fmoc-D-Lys(Boc)-OH, Fmoc-Gly-OH, Fmoc-D-Pro-OH, Fmoc-D-Met-OH, Fmoc-D-Pro-OH, and Fmoc-D-Phe-OH, with end-capping after each step. After the final N-terminal deprotection, the peptide was then cleaved from the resin and purified using the HPLC general method and an Agilent C18 RP-HPLC column (100 Å, 5 µm, 250 mm, 4.6 mm). The desired peptide was isolated as a white solid after lyophilization (6 mg, 12%). The desired peptide was isolated as a white solid after lyophilization (6 mg, 12%). Monoisotopic mass calculated for  $C_{69}H_{111}N_{23}O_{16}S$  775.9223, found (FTICR-ESI-MS) 775.9216  $[M + 2H]^{2+}$ .

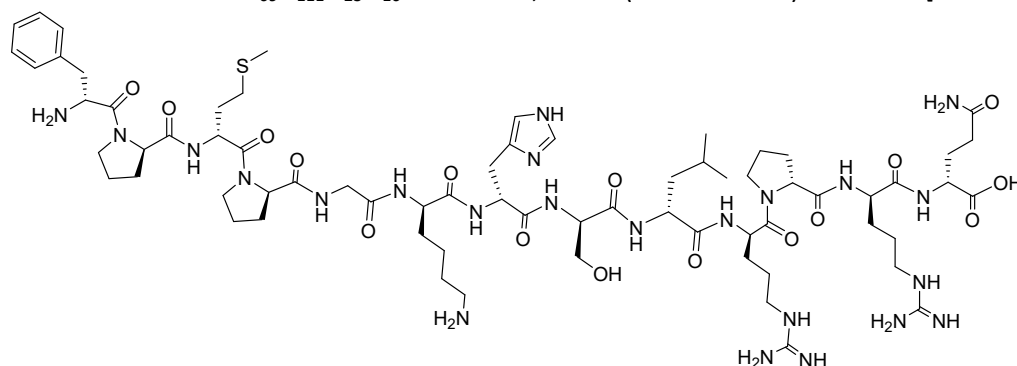

Fig. S1(a). Chemical structure of RI-13

### b. RI-13A2

Peptide RI-13A2 was synthesized following the general SPPS elongation procedure introducing amino acids in the following order: FmocD-Arg(Pbf)-OH, Fmoc-D-Pro-OH, Fmoc-D-Arg(Pbf)-OH, Fmoc-D-Leu-OH, Fmoc-D-Ser(tBu)- OH, Fmoc-D-His(Trt)-OH, Fmoc-D-Lys(Boc)-OH, Fmoc-Gly-OH, Fmoc-D-Pro-OH, Fmoc-DMet-OH, Fmoc-Aib-OH, and Fmoc-D-BrF-OH, with end-capping after each step. After the final N-terminal deprotection, the peptide was then cleaved from the resin and purified using the HPLC general method and an Agilent C18 RP-HPLC column (100 Å, 5 µm, 250 mm, 4.6 mm). The desired peptide was isolated as a white solid after lyophilization (8 mg, 16%). Monoisotopic mass calculated for  $C_{69}H_{112}BrN_{23}O_{16}$  799.8993, found (FTICR-ESI-MS) 799.8981  $[M + 2H]^{2+}$ .

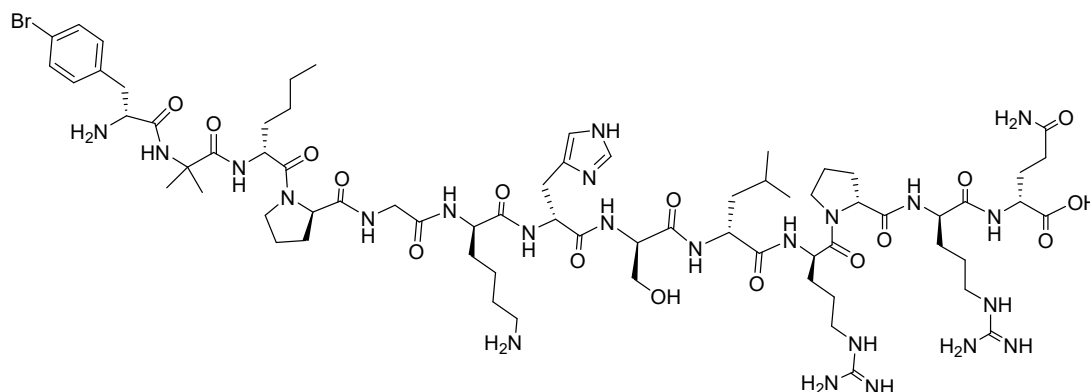

**Fig. S1(b).** Chemical structure of RI-13A2

c. RI-17

Peptide RI-17 was synthesized following the general SPPS elongation procedure introducing amino acids in the following order: Fmoc-D-Phe-OH, Fmoc-D-Arg(Pbf)-OH, Fmoc-D-Arg(Pbf)-OH, Fmoc-D-Gln(Trt)-OH, Fmoc-D-Arg(Pbf)-OH, Fmoc-D-Pro-OH, Fmoc-D-Arg(Pbf)-OH, Fmoc-D-Leu-OH, Fmoc-D-Ser(tBu)-OH, Fmoc-D-His(Trt)-OH, Fmoc-D-Lys(Boc)-OH, Fmoc-Gly-OH, Fmoc-D-Pro-OH, Fmoc-D-MetOH, Fmoc-D-Pro-OH, and Fmoc-D-Phe-OH, with end-capping after each step. After the final N terminal deprotection, the peptide was then cleaved from the resin and purified using the HPLC general method and an Agilent C18 RP-HPLC column (100 Å, 5 µm, 250 mm, 4.6 mm). The desired peptide was isolated as a white solid after lyophilization (15 mg, 30%). Monoisotopic mass calculated for  $C_{96}H_{156}N_{34}O_{20}S$  1069.6051, found (FTICR-ESI-MS) 1069.605 [M + 2H]<sup>2+</sup>.

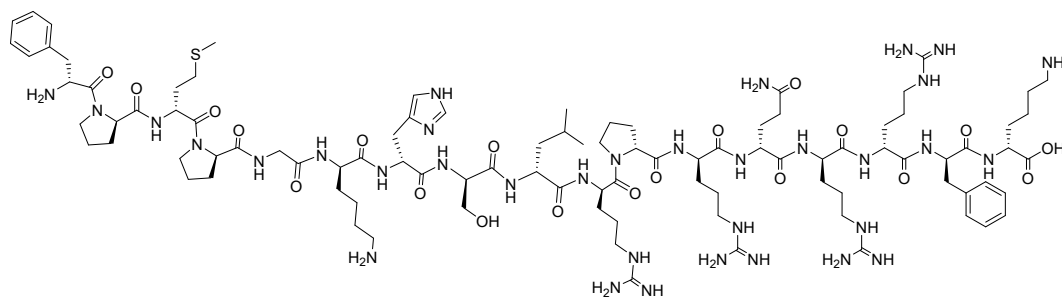

**Fig. S1(c).** Chemical structure of RI-17

d. RI-17A2

Peptide RI-17 was synthesized following the general SPPS elongation procedure introducing amino acids in the following order: FmocD-Phe-OH, Fmoc-D-Arg(Pbf)-OH, Fmoc-D-Arg(Pbf)-OH, Fmoc-D-Gln(Trt)-OH, Fmoc-D-Arg(Pbf)-OH, Fmoc-D-Pro-OH, Fmoc-D-Arg(Pbf)-OH, Fmoc-D-Leu-OH, Fmoc-D-Ser(tBu)-OH, Fmoc-D-His(Trt)-OH, Fmoc-D-Lys(Boc)-OH, Fmoc-Gly-OH, Fmoc-D-Pro-OH, Fmoc-D-Nle-OH, Fmoc-Aib-OH, and Fmoc-D-BrF-OH, with end-capping after each step. After the final N-terminal deprotection, the peptide was then cleaved from the resin and purified using the HPLC general method and an Agilent C18 RP-HPLC column (100 Å, 5 µm, 250 mm, 4.6 mm).

The desired peptide was isolated as a white solid after lyophilization (12 mg, 24%). Monoisotopic mass calculated for  $C_{96}H_{157}BrN_{34}O_{20}$  1093.5821, found (FTICR-ESI-MS) 1093.5839  $[M + 2H]^{2+}$ .

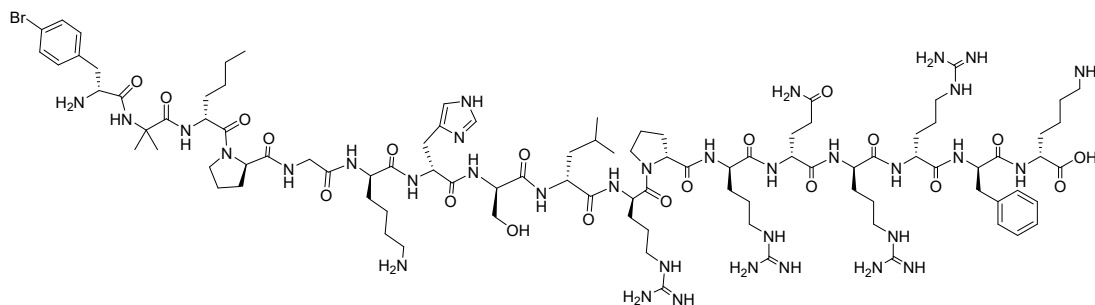

**Fig. S1(d). Chemical structure of RI-17A2**

\*All RI peptides were obtained in 90-95% purity by HPLC. The trace impurities were identified as truncated, inactive peptides.

## 2. Radioligand displacement assays of RI apelin analogues

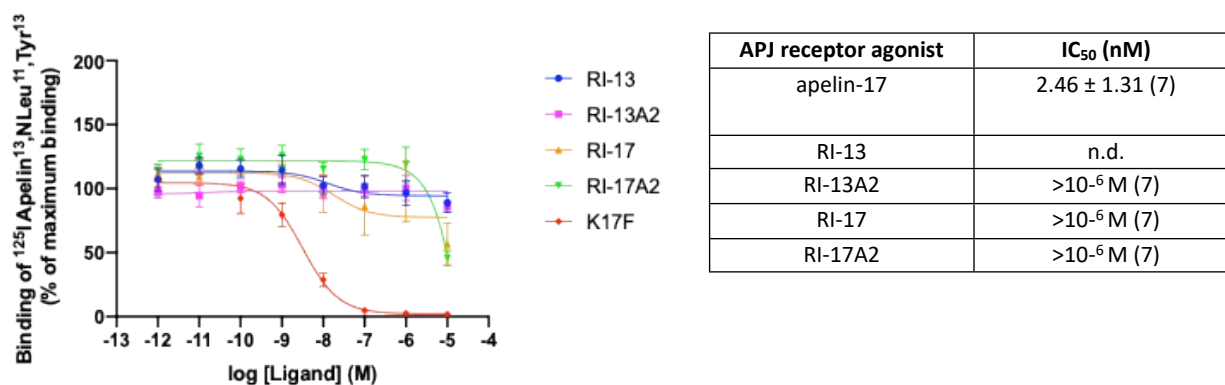

**Figure S2. Competition binding curves of different apelin receptor ligands.** Membranes of CHO cells stably expressing the hApelinR were incubated with 0.2 nM of radiolabeled  $[^{125}I]$ -Apelin-13 (Apelin 13, Nle11, Tyr13) in the presence of increasing concentrations of each ligand (from 1 pM to 10  $\mu$ M). Data are expressed as a percentage of maximal binding of  $[^{125}I]$ -Apelin-13 in the absence of any unlabeled ligand. Graphic is a compilation of 4 independent experiments performed in duplicate. Error bars represent the SE.

### 3. Effects of APJ agonists on blood pressure

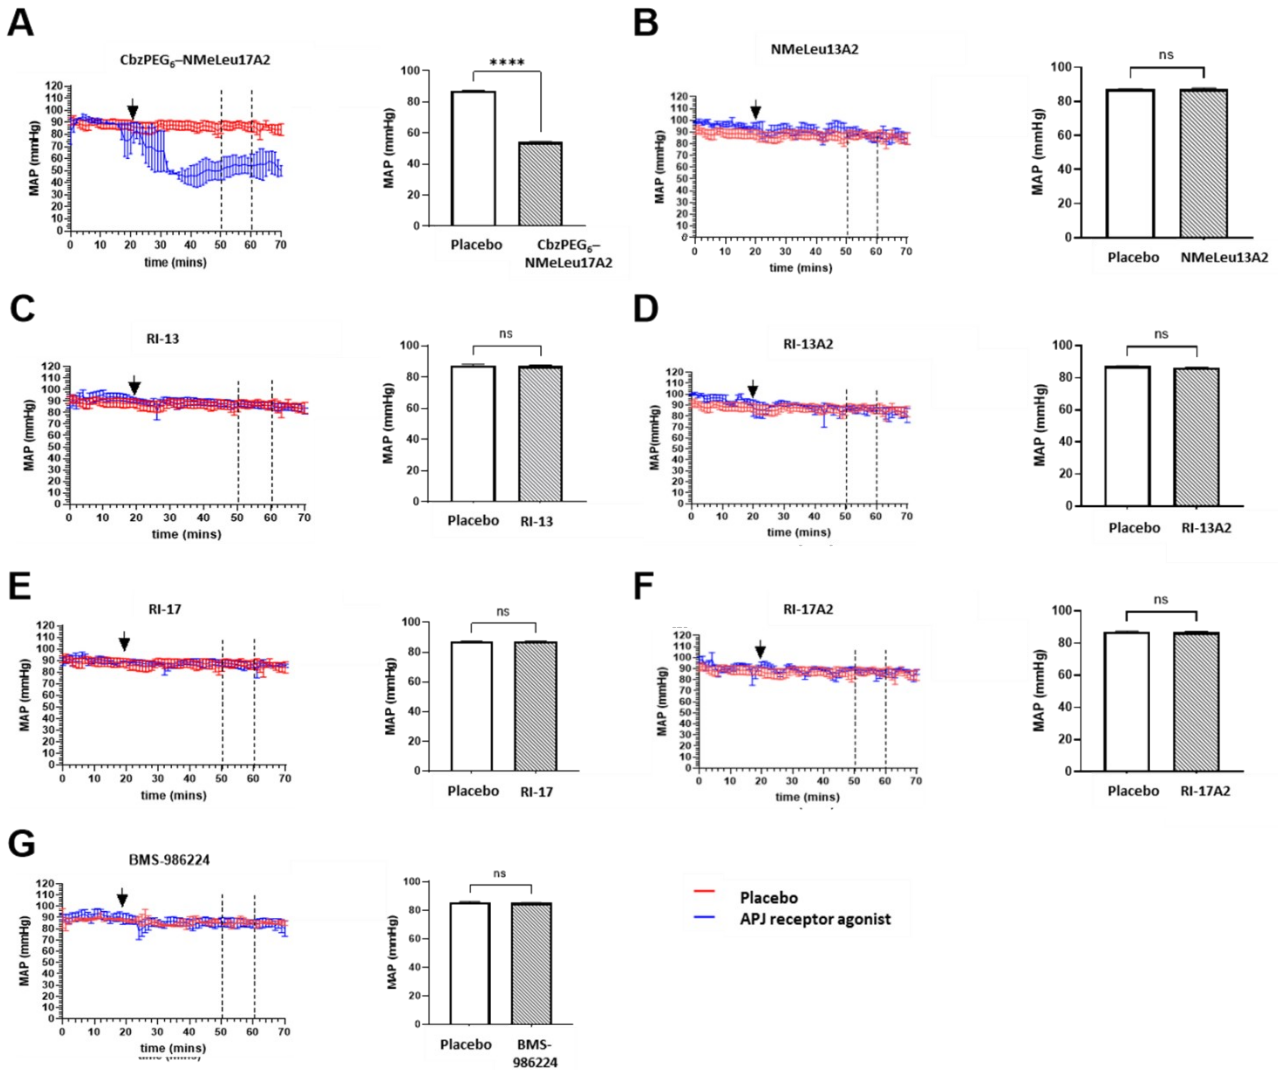

**Figure S3.** Different effects of apelin analog and receptor agonist on blood pressure and ischemia-reperfusion injury. A) the effect of CbzPEG<sub>6</sub>-NMeLeu17A2 (n=3) on mean arterial blood pressure (MAP), B) the effect of apelin 13 analog, NMeLeu13A2, on MAP (n=4). The effect of apelin 13 analog reverse enantiomers, C) RI13 (n=4) and D) RI13A2 (n=4), on MAP. The effect of apelin 17 reverse enantiomers, E) RI17 (n=4) and F) RI17A2 (n=4) on MAP. G) The effect of small molecule apelin receptor agonist BMS-986224 on blood pressure (n=4). The MAP recording between 50 and 60 minutes has been averaged and compared with their controls (placebo (n=4)). The vehicle for BMS-986224 is 0.1% DMSO (n=3). The arrow indicates the time when analogs were introduced. Values mean  $\pm$ SEM and \*\*\*\*P<0.0001, compared to the control group.

#### 4. Biased signaling profile values for tested APJ ligands

Table S1. BRET-detected logEC<sub>50</sub> values for individual activation pathways

|                                       | Gαi1 activation<br>log EC <sub>50</sub> | Gαi2 activation<br>log EC <sub>50</sub> | β-arr1 recruitment<br>log EC <sub>50</sub> | β-arr2 recruitment log<br>EC <sub>50</sub> |
|---------------------------------------|-----------------------------------------|-----------------------------------------|--------------------------------------------|--------------------------------------------|
| <b>AMG-986</b>                        | 10.56 ± 0.07                            | 10.67 ± 0.04                            | 8.96 ± 0.04                                | 9.00 ± 0.03                                |
| <b>BMS-986224</b>                     | 9.99 ± 0.05                             | 9.96 ± 0.04                             | 7.97 ± 0.04                                | 8.05 ± 0.02                                |
| <b>pyr-apelin-13</b>                  | 9.78 ± 0.06                             | 9.75 ± 0.04                             | 7.74 ± 0.02                                | 7.76 ± 0.01                                |
| <b>apelin-17</b>                      | 10.69 ± 0.10                            | 10.78 ± 0.02                            | 8.77 ± 0.02                                | 8.74 ± 0.03                                |
| <b>NMe13A2</b>                        | 10.47 ± 0.06                            | 10.66 ± 0.04                            | 8.91 ± 0.03                                | 8.94 ± 0.03                                |
| <b>Cbz-PEG<sub>6</sub>-NMeLeu17A2</b> | 10.52 ± 0.08                            | 10.73 ± 0.04                            | 9.04 ± 0.03                                | 8.81 ± 0.07                                |
| <b>apelin 8-mer C-terminal</b>        | 6.31 ± 0.05                             | 6.46 ± 0.03                             | n.d.                                       | n.d.                                       |
| <b>apelin 9-mer N-terminal</b>        | n.d.                                    | n.d.                                    | -                                          | -                                          |
| <b>apelin-5-mer C-terminal</b>        | 5.97 ± 0.06                             | 5.94 ± 0.04                             | -                                          | -                                          |
